# Supplementary material for: Perceived Health Benefits in Vestibular Schwannoma Patients with Long-Term Postoperative Headache: Insights from Personality Traits and Pain Coping—A Cross-Sectional Study
Source: MDPI journal article supplement (doi:10.3390/jpm14010075), 2024-01-08
Supplement: s1 [file s1]

**Table S1.** Comprehensive correlation matrix for personality, psychological burden and perceived health benefit as well as demographic and disease-related variables ( $n = 50$ ).

|                     | <i>FESV</i> |        |        |       |       |       |      |      |      | <i>HADS-D</i> |         |        |                 | <i>GBI</i>        |               |         |                   |                    |       |
|---------------------|-------------|--------|--------|-------|-------|-------|------|------|------|---------------|---------|--------|-----------------|-------------------|---------------|---------|-------------------|--------------------|-------|
|                     | HD          | ANX    | ANG    | APC   | CR    | EC    | MD   | CA   | RR   | depression    | anxiety | total  | hearing<br>loss | facial<br>paresis | pain<br>(NAS) | general | social<br>support | physical<br>health | total |
| gender              | -.08        | -.04   | -.15   | -.13  | .17   | .17   | .01  | -.24 | .23  | -.28          | -.05    | -.16   | -.05            | .23               | .03           | .12     | -.06              | .26                | .24   |
| age                 | -.27        | -.32*  | -.32*  | .08   | .27   | .30*  | .18  | -.23 | .22  | -.18          | -.26    | -.23   | -.31*           | .05               | -.20          | -.02    | .30               | .25                | .20   |
| hearing loss        | .16         | .29*   | .37**  | -.13  | -.33* | -.19  | -.17 | .11  | .01  | .37**         | .04     | .20    | -               | -                 | -             | .01     | -.16              | -.06               | -.12  |
| facial paresis      | -.03        | .01    | -.23   | .14   | .06   | .02   | -.11 | -.13 | -.16 | -.13          | .09     | -.02   | -               | -                 | -             | .17     | -.07              | -.07               | .18   |
| pain (NAS)          | .24         | .21    | .19    | .11   | .01   | -.10  | -.23 | -.17 | .15  | .25           | .02     | .09    | -               | -                 | -             | -.23    | -.08              | .18                | -.28  |
| <i>TIPI-G</i>       |             |        |        |       |       |       |      |      |      |               |         |        |                 |                   |               |         |                   |                    |       |
| extraversion        | -.21        | -.32*  | -.39*  | .09   | .23   | .30*  | -.01 | .12  | -.06 | -.49**        | -.23    | -.34*  | -.29*           | -.03              | -.39**        | .07     | .14               | .33*               | .20   |
| agreeableness       | -.02        | -.03   | -.13   | .25   | -.02  | .19   | .05  | -.24 | .18  | -.07          | -.12    | -.10   | -.01            | .17               | -.003         | .19     | .14               | .21                | .23   |
| conscientiousness   | .10         | -.03   | .04    | -.07  | .16   | .15   | .17  | .14  | .27  | -.06          | -.31*   | -.24   | -.11            | -.01              | .06           | -.14    | -.00              | -.20               | -.21  |
| emotional stability | -.42**      | -.58** | -.59** | .13   | .20   | .48** | .01  | .02  | .09  | -.35*         | -.63**  | -.56** | -.15            | -.17              | -.31*         | .02     | .07               | .20                | -.14  |
| openness            | -.46**      | -.50** | -.42** | .24   | .15   | .23   | -.12 | .12  | .05  | -.47**        | -.29    | -.35*  | -.17            | -.13              | -.32*         | .11     | -.12              | .17                | .14   |
| <i>GBI</i>          |             |        |        |       |       |       |      |      |      |               |         |        |                 |                   |               |         |                   |                    |       |
| general             | -.40**      | -.35*  | -.25   | .39** | .40** | .39** | .03  | .18  | .08  | -.25          | -.24    | -.29   | .01             | .17               | -.23          | -       | -                 | -                  | -     |
| social support      | .05         | -.06   | -.02   | .04   | .02   | .07   | -.11 | -.14 | .06  | -.01          | .09     | .04    | -.16            | -.07              | -.08          | -       | -                 | -                  | -     |
| physical health     | -.45**      | -.30*  | -.25   | .18   | .33*  | .46** | .09  | .10  | .14  | -.40*         | -.33*   | -.37*  | -.06            | -.07              | -.10          | -       | -                 | -                  | -     |
| total               | -.44**      | -.37*  | -.32*  | .31*  | .49** | .50** | .13  | .20  | .10  | -.39*         | -.27    | -.38** | -.12            | .15               | -.28          | -       | -                 | -                  | -     |

*Abbreviations.* TIPI-G = Ten Item Personality Inventory German, FESV = Questionnaire for the Assessment of Pain-related Behavior, NAS = numerical analogue scale, HD = helplessness and depression, ANX = anxiety, ANG = anger, APC = action-planning competence, CR = cognitive restructuring, EC = experience of competence, MD = mental distraction, CA = counteractive activities, RR = rest and relaxation, GBI = Global Benefit Inventory. \*  $p < 0.05$ , \*\*  $p < 0.001$ .
